# Supplementary material for: Correlation of electrochromic properties and oxidation states in nanocrystalline tungsten trioxide
Source: Royal Society of Chemistry journal article supplement (doi:10.1039/c5cp02482j), 2015-01-01
Supplement: c5cp02482j1.pdf [file c5cp02482j1.pdf]

**Supporting information S1:** Results of the Rietveld refinement of the sample prepared by heating the sol-gel precursor to 300 °C.

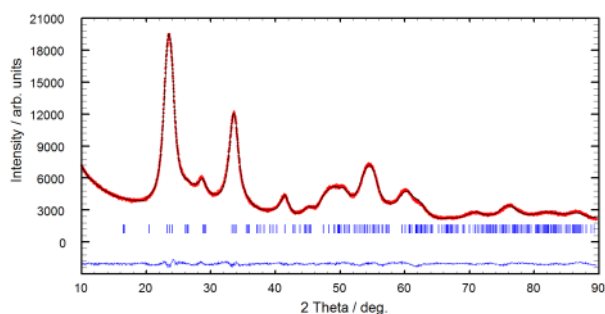

Figure S1.1 – Graphical results of the Rietveld refinement of the sample heated to 300 °C. Red line: observed profile; black line: calculated profile; blue line: differential plot for observed and calculated data; blue vertical bars indicate the theoretical positions of Bragg-reflections.

Table S1.1 – Numerical results of the Rietveld refinement of the sample heated to 300 °C.

|                                  |                                                                                                      |
|----------------------------------|------------------------------------------------------------------------------------------------------|
| composition                      | WO <sub>3</sub>                                                                                      |
| space group                      | <i>Pnma</i>                                                                                          |
| lattice parameters               | $a = 754.99(21)$ pm<br>$b = 742.1(2)$ pm<br>$c = 767.1(2)$ pm                                        |
| formula units                    | 8                                                                                                    |
| unit cell volume                 | $53.73 \times 10^6$ pm <sup>3</sup>                                                                  |
| (normalized to one formula unit) |                                                                                                      |
| calculated density               | 7.17 g/cm <sup>3</sup>                                                                               |
| diffractometer                   | PANalytical Empyrean MPD                                                                             |
| wavelength                       | Cu K $\alpha$ ( $\lambda_1 = 154.056$ pm; $\lambda_2 = 154.539$ pm; $I(\lambda_1/\lambda_2 = 0.5)$ ) |
| profile points                   | 3070                                                                                                 |
| 2 $\theta$ range                 | 10–90°                                                                                               |
| $R_{Bragg}$                      | 0.007                                                                                                |
| $R_{wp}$                         | 0.019                                                                                                |
| $R_{exp}$                        | 0.015                                                                                                |
| $S$                              | 1.3                                                                                                  |

Table S1.2 – Structural parameters for the sample heated to 300 °C. Owing to the nanocrystalline nature of the sample, atomic positions of oxygen atoms were not refined. Isotropic Debye-Waller factors were refined to a combined value for all atoms of  $B_{overall} = 1.312$  Å<sup>2</sup>.

| Atom | site | $x$ | $y$ | $z$ |
|------|------|-----|-----|-----|
|      |      |     |     |     |

|    |    |           |   |           |
|----|----|-----------|---|-----------|
| W1 | 4c | 0.0073(4) | ¼ | 0.9760(8) |
| W2 | 4c | 0.0264(6) | ¼ | 0.472(7)  |
| O1 | 4a | 0         | 0 | 0         |
| O2 | 4b | 0         | 0 | ½         |
| O3 | 4c | 0.269     | ¼ | 0.973     |
| O4 | 4c | 0.278     | ¼ | 0.529     |
| O5 | 4c | 0.004     | ¼ | 0.738     |
| O6 | 4c | 0.015     | ¼ | 0.224     |

**Supporting information S2:** Results of the Rietveld refinement of the sample prepared by heating the sol-gel precursor to 450 °C.

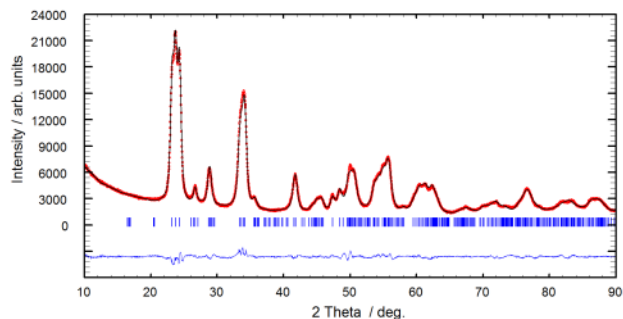

Figure S2.1 – Graphical results of the Rietveld refinement of the sample heated to 450 °C. Red line: observed profile; black line: calculated profile; blue line: differential plot for observed and calculated data; blue vertical bars indicate the theoretical positions of Bragg-reflections.

Table S2.1 – Numerical results of the Rietveld refinement of the sample heated to 450 °C.

|                                  |                                                                                                                                                          |
|----------------------------------|----------------------------------------------------------------------------------------------------------------------------------------------------------|
| composition                      | WO <sub>3</sub>                                                                                                                                          |
| space group                      | <i>P2<sub>1</sub>/n</i>                                                                                                                                  |
| lattice parameters               | <i>a</i> = 733.83(6) pm<br><i>b</i> = 751.94(7) pm<br><i>c</i> = 768.41(7) pm<br><i>β</i> = 90.53(1)°                                                    |
| formula units                    | 8                                                                                                                                                        |
| unit cell volume                 | 54.12 × 10 <sup>6</sup> pm <sup>3</sup>                                                                                                                  |
| (normalized to one formula unit) |                                                                                                                                                          |
| calculated density               | 7.259 g/cm <sup>3</sup>                                                                                                                                  |
| diffractometer                   | PANalytical Empyrean MPD                                                                                                                                 |
| wavelength                       | Cu K <sub>α</sub> ( <i>λ</i> <sub>1</sub> = 154.056 pm; <i>λ</i> <sub>2</sub> = 154.539 pm;<br>1( <i>λ</i> <sub>1</sub> / <i>λ</i> <sub>2</sub> ) = 0.5) |
| profile points                   | 3070                                                                                                                                                     |
| 2θ range                         | 10–90°                                                                                                                                                   |
| <i>R</i> <sub>Bragg</sub>        | 0.014                                                                                                                                                    |
| <i>R</i> <sub>wp</sub>           | 0.034                                                                                                                                                    |
| <i>R</i> <sub>exp</sub>          | 0.017                                                                                                                                                    |
| <i>S</i>                         | 2.02                                                                                                                                                     |

Table S2.2 – Structural parameters for the sample heated to 450 °C. Owing to the nanocrystalline nature of the sample, atomic positions were not refined. Isotropic Debye-Waller factors were refined to a combined value for all atoms of *B*<sub>overall</sub> = 1.253 Å<sup>2</sup>.

| Atom | site | <i>x</i> | <i>y</i> | <i>z</i> |
|------|------|----------|----------|----------|
| W1   | 4e   | 0.25346  | 0.02452  | 0.28322  |
| W2   | 4e   | 0.25076  | 0.02197  | 0.78284  |
| O1   | 4e   | 0.0025   | 0.035    | 0.2106   |
| O2   | 4e   | 0.9974   | 0.46360  | 0.2161   |
| O3   | 4e   | 0.284    | 0.26050  | 0.2848   |
| O4   | 4e   | 0.2099   | 0.2568   | 0.7318   |
| O5   | 4e   | 0.2827   | 0.0383   | 0.0046   |
| O6   | 4e   | 0.2856   | 0.484    | 0.9944   |
